# Supplementary material
Source: PubMed Central journal article supplement (PMC6439888)
Supplement: jamapediatr-173-269-s001.pdf [file jamapediatr-173-269-s001.pdf]

## Supplementary Online Content

McDaniel CE, Ralston S, Lucas B, Schroeder AR. Association of diagnostic criteria with urinary tract infection prevalence in bronchiolitis: a systematic review and meta-analysis. *JAMA Pediatr*. Published online January 28, 2019. doi:10.1001/jamapediatrics.2018.5091

**eAppendix 1.** Search Strategy

**eAppendix 2.** Quality Assessment

**eTable.** MOOSE Checklist: Impact of Diagnostic Criteria on UTI Prevalence in Bronchiolitis: a Meta-Analysis

This supplementary material has been provided by the authors to give readers additional information about their work.

## eAppendix 1. Search Strategy

| Medline |                                                                                                                                                                                                                                                                                                                                                                       |  |  |  |  |  |  |  |  |
|---------|-----------------------------------------------------------------------------------------------------------------------------------------------------------------------------------------------------------------------------------------------------------------------------------------------------------------------------------------------------------------------|--|--|--|--|--|--|--|--|
| 1       | urinary tract infections/ or bacteriuria/ or pyuria/ or (bacteriuria\$ or pyuria\$ or urinary tract infect\$).ti.                                                                                                                                                                                                                                                     |  |  |  |  |  |  |  |  |
| 2       | bronchiolitis/ or bronchiolitis, viral/ or bronchitis, chronic/ or bronchioliti\$.tw,kw.                                                                                                                                                                                                                                                                              |  |  |  |  |  |  |  |  |
| 3       | respiratory syncytial viruses/ or respiratory syncytial virus, human/ or ((rsv and respir\$) or respir\$ syncytial virus\$).tw,kw.                                                                                                                                                                                                                                    |  |  |  |  |  |  |  |  |
| 4       | bronchopneumonia/ or pleuropneumonia/ or ((pneumonia/ or pneumonia, bacterial/ or chlamydial pneumonia/ or pneumonia, mycoplasma/ or pneumonia, pneumococcal/ or pneumonia, rickettsial/ or pneumonia, staphylococcal/ or pneumonia, necrotizing/ or pneumonia, pneumocystis/ or pneumonia, viral/) and (lung\$ or pleur\$ or respir\$ or bronch\$ or pulm\$).tw,kw.) |  |  |  |  |  |  |  |  |
| 5       | ((pneumonia\$ and (lung\$ or pleur\$ or respir\$ or bronch\$ or pulm\$)) or (bronchopneumonia\$ or pleuropneumonia\$)).tw,kw.                                                                                                                                                                                                                                         |  |  |  |  |  |  |  |  |
| 6       | Influenza, Human/ or exp orthomyxoviridae/ or exp orthomyxoviridae infections/                                                                                                                                                                                                                                                                                        |  |  |  |  |  |  |  |  |
| 7       | (influenza\$ or flu or flus or grippe or orthomyxovir\$).tw,kw.                                                                                                                                                                                                                                                                                                       |  |  |  |  |  |  |  |  |
| 8       | or/2-7 [respiratory infections]                                                                                                                                                                                                                                                                                                                                       |  |  |  |  |  |  |  |  |
| 9       | hyperbilirubinemia/ or hyperbilirubinemia, neonatal/ or jaundice, neonatal/ or jaundice/ or jaundice, obstructive/ or kernicterus/ or (hyperbilirubinemi\$ or bilirubinemi\$ or jaundice or icterus or kernicterus or bilirubin encephalopath\$).tw,kw.                                                                                                               |  |  |  |  |  |  |  |  |
| 10      | brief resolved unexplained event\$.mp.                                                                                                                                                                                                                                                                                                                                |  |  |  |  |  |  |  |  |
| 11      | apparent life-threatening event\$.mp.                                                                                                                                                                                                                                                                                                                                 |  |  |  |  |  |  |  |  |
| 12      | gastroenteritis/ or exp enteritis/ or exp enterocolitis/ or exp proctitis/                                                                                                                                                                                                                                                                                            |  |  |  |  |  |  |  |  |
| 13      | (gastroenteriti\$ or enteriti\$ or duodeniti\$ or ileiti\$ or pouchiti\$ or enterocoliti\$ or proctiti\$).tw,kw.                                                                                                                                                                                                                                                      |  |  |  |  |  |  |  |  |
| 14      | rotavirus infections/ or rotavirus/ or rotavir\$.tw,kw.                                                                                                                                                                                                                                                                                                               |  |  |  |  |  |  |  |  |
| 15      | cellulitis/ or soft tissue infection/ or (cellulitis or phlegmon or ((soft tissue or derm\$ or epiderm\$) adj3 infect\$)).tw,kw.                                                                                                                                                                                                                                      |  |  |  |  |  |  |  |  |
| 16      | or/2-15                                                                                                                                                                                                                                                                                                                                                               |  |  |  |  |  |  |  |  |
| 17      | 1 and 16                                                                                                                                                                                                                                                                                                                                                              |  |  |  |  |  |  |  |  |
| 18      | limit 17 to "all infant (birth to 23 months)"                                                                                                                                                                                                                                                                                                                         |  |  |  |  |  |  |  |  |
| 19      | 17 and (newborn\$ or neonat\$ or baby or babies or infant\$).ti,ab,kw,so,jw.                                                                                                                                                                                                                                                                                          |  |  |  |  |  |  |  |  |
| 20      | 18 or 19                                                                                                                                                                                                                                                                                                                                                              |  |  |  |  |  |  |  |  |
| 21      | limit 20 to english language                                                                                                                                                                                                                                                                                                                                          |  |  |  |  |  |  |  |  |
| 22      | remove duplicates from 21                                                                                                                                                                                                                                                                                                                                             |  |  |  |  |  |  |  |  |
| 23      | *urinary tract infections/ or *bacteriuria/ or *pyuria/ or (bacteriuria\$ or pyuria\$ or urinary tract infect\$).ti.                                                                                                                                                                                                                                                  |  |  |  |  |  |  |  |  |
| 24      | limit 23 to (("diagnosis (maximizes specificity)" or "causation-etiology (maximizes specificity)") and last 5 years)                                                                                                                                                                                                                                                  |  |  |  |  |  |  |  |  |

|    |                                               |  |  |  |  |  |  |
|----|-----------------------------------------------|--|--|--|--|--|--|
| 25 | limit 24 to "all infant (birth to 23 months)" |  |  |  |  |  |  |
| 26 | limit 25 to english language                  |  |  |  |  |  |  |
| 27 | remove duplicates from 26                     |  |  |  |  |  |  |
| 28 | pregnan\$.tw,kw.                              |  |  |  |  |  |  |
| 29 | 27 not 28                                     |  |  |  |  |  |  |

**eAppendix 2. Quality Assessment**

| Study                          | Quality Assessment                                                                 |                                                                    |                                                              |                                                                            |                                                                  |                                                                                                                                                 |                                             |
|--------------------------------|------------------------------------------------------------------------------------|--------------------------------------------------------------------|--------------------------------------------------------------|----------------------------------------------------------------------------|------------------------------------------------------------------|-------------------------------------------------------------------------------------------------------------------------------------------------|---------------------------------------------|
|                                | Was the sample representative of the target population? (I.e. bronchiolitis + UTI) | Were study participants recruited in an appropriate and clear way? | Were the study subjects and the setting described in detail? | Were objective, standard criteria used for the diagnosis of bronchiolitis? | Were objective, standard criteria used for the diagnosis of UTI? | Are all important confounding factors/differences identified and accounted for? (e.g. known urologic abnormalities, severe comorbid conditions) | Was there appropriate statistical analysis? |
| Antonow et al. 1998            |                                                                                    |                                                                    |                                                              |                                                                            |                                                                  |                                                                                                                                                 |                                             |
| Melendez and Harper 2003       |                                                                                    |                                                                    |                                                              |                                                                            |                                                                  |                                                                                                                                                 |                                             |
| Schlechter Salinas et al. 2017 |                                                                                    |                                                                    |                                                              |                                                                            |                                                                  |                                                                                                                                                 |                                             |
| Kaluarachchi et al. 2014       |                                                                                    |                                                                    |                                                              |                                                                            |                                                                  |                                                                                                                                                 |                                             |
| Elkhunovich and Wang 2015      |                                                                                    |                                                                    |                                                              |                                                                            |                                                                  |                                                                                                                                                 |                                             |
| Luginbuhl et al. 2008          |                                                                                    |                                                                    |                                                              |                                                                            |                                                                  |                                                                                                                                                 |                                             |
| Randolph et al. 2004           |                                                                                    |                                                                    |                                                              |                                                                            |                                                                  |                                                                                                                                                 |                                             |
| <b>Key</b>                     | Pass                                                                               | Fail                                                               | Information not provided                                     |                                                                            |                                                                  |                                                                                                                                                 |                                             |
|                                |                                                                                    |                                                                    |                                                              |                                                                            |                                                                  |                                                                                                                                                 |                                             |

**eTable.** MOOSE Checklist: Impact of Diagnostic Criteria on UTI Prevalence in Bronchiolitis: a Meta-Analysis

|                                                                                                          |                                     |
|----------------------------------------------------------------------------------------------------------|-------------------------------------|
| Reporting of background should include                                                                   |                                     |
| - Problem definition                                                                                     | Intro, para 2                       |
| - Hypothesis statement                                                                                   | Intro, para 4                       |
| - Description of study outcomes                                                                          | Intro, para 4                       |
| - Type of exposure or intervention used                                                                  | Intro, para 4                       |
| - Type of study designs used                                                                             | Study selection, para 1             |
| - Study population                                                                                       | Search strategy, para 1             |
| Reporting of search strategy should include                                                              |                                     |
| - Qualifications of searchers                                                                            | Search strategy, para 1             |
| - Search strategy, including time period                                                                 | Search strategy, para 1             |
| - Effort to include all available studies, including contact with authors                                | Search strategy, para 1             |
| - Databases and registries searched                                                                      | Search strategy, para 1             |
| - Search software used, name and version, including special features used                                | n/a                                 |
| - Use of hand searching                                                                                  | Study selection, para 2             |
| - List of citations located and those excluded, including justification                                  | Figure 1                            |
| - Method of addressing articles published in languages other than English                                | Search strategy, para 1             |
| - Method of handling abstracts and unpublished studies                                                   | Figure 1                            |
| - Description of any contact with authors                                                                | Search strategy, para 2             |
| Reporting of methods should include                                                                      |                                     |
| - Description of relevance or appropriateness of studies assembled for assessing hypothesis to be tested | Study selection, para 1             |
| - Rationale for the selection and coding of data                                                         | Study selection, para 2             |
| - Documentation of how data were classified and coded                                                    | Identification & data extraction    |
| - Assessment of confounding                                                                              | Quality assessment                  |
| - Assessment of study quality                                                                            | Quality assessment                  |
| - Assessment of heterogeneity                                                                            | Statistical analysis                |
| - Description of statistical methods                                                                     | Statistical analysis                |
| - Provision of appropriate tables and graphics                                                           | Figure 1                            |
| Reporting of results should include                                                                      |                                     |
| - Graphic summarizing individual study estimates and overall estimate                                    | Figure 2, 3                         |
| - Table giving descriptive information for each study included                                           | Table 1                             |
| - Results of sensitivity testing                                                                         | Results, Bronchiolitis Supplement B |
| - Indication of statistical uncertainty of findings                                                      | Results, prevalence of UTI          |
| Reporting of discussion should include                                                                   |                                     |
| - Quantitative assessment of bias                                                                        | Discussion, para 1                  |
| - Justification for exclusion                                                                            | Figure 1                            |
| - Assessment of quality of included studies                                                              | Discussion, para 1                  |
| Reporting of conclusions should include                                                                  |                                     |
| - Consideration of alternative explanations for observed results                                         | Discussion, para 2 & 7              |
| - Generalization of conclusions                                                                          | Discussion, para 8 & Conclusion     |
| - Guidelines for future research                                                                         | Discussion, para 6                  |
| - Disclosure of funding source                                                                           | Acknowledgments                     |
